# Supplementary material
Source: publisher site journal article supplement (http://www.sagepub.com/logiostudy/SupplementalReadings/Part_II_Quizzes%20and%20Projects.doc)
Supplement: Supplementary file 1 [file Part_II_Quizzes%20and%20Projects.doc]

**Part II a**

**Quizzes and Projects**

**REVIEW QUIZ**

NAME____________________________________
INSTRUCTOR_____________________________
DATE____________________________________

(1) About percent of respondents favor a woman's right to an abortion under any condition.

(2) Within the GSS sample, the variable shows the most respondents supporting a woman's right to an abortion.

(3) Less than one thousand (1,000) respondents are included in the results for the abortion variables, rather than the full sample size of fifteen hundred (1,500). The cases that are not included are labeled

(4) The condition-specific abortion variables can be divided into two groups: one with high support and one with low support for abor­tion. These two groups can be distinguished based on

**Part II a**

**INDEPENDENT PROJECT A**

NAME _______________________________
INSTRUCTOR_________________________
DATE________________________________

Using the **BINGE.SAV** data file on the disk, request frequency distribu­tions for the variables **HRSSTUDY, HRSSOCLZ, and HRSSPORT**. Examine the three frequencies and create a table. Use the outline below.

Percent of respondents who report two (2) or fewer hours per day spent on each of the following activities:

**Activity *%*** **Valid N**

Studying outside of class

Socializing with friends

Participating in intercollegiate athletics

**Part II b**

**REVIEW QUIZ**

NAME___________________________
INSTRUCTOR_____________________
DATE____________________________

(1) To create a composite measure of prejudice, the text suggests com­bining ________________, and ________________.

(2) For combining two (2) or more variables with the same coding scheme, the TRANSFORM -* is the best method.

(3) When combining three (3) variables into an index, your new index variable will have response categories (not including miss­ing cases).

(4) The text suggests creating a composite measure of drug use on col­lege campuses using the .SAV data file.

(5) If you wanted to study variation across the fifty (50) states in the amount of crime known to the police, you should use the .SAV data file.

**Part II b**

**INDEPENDENT PROJECT**

NAME________________________________________
INSTRUCTOR_________________________________
DATE________________________________________

Using the **BINGE.SAV** data file on your disk, request frequency distribu­tions for the variables **USEGRASS** and **CIGARETT**. Create a new vari­able that is a composite measure of respondents who have used eight cig­arettes or marijuana in the past thirty (30) days.

Use the COUNT technique in SPSS to create a new variable of "past 30 day drug users." Request the frequency distribution for your new vari­able.

How many respondents report not using either marijuana or cigarettes in the past 30 days?

What percentage of respondents report using one of the drugs?

What percentage of respondents report using both drugs in the past 30 days?

What is the valid N for the new variable?

**Part II b**

**INDEPENDENT PROJECT**

NAME _________________________

INSTRUCTOR___________________

DATE__________________________

Using the **GSS.SAV** data file on your disk, review the frequency distri­butions for three variables about racial attitudes (RACDIF4, RACSEG, RACPREZ). Look carefully at the value labels and the corresponding codes.

Create an index variable that measures levels of racial prejudice by com­bining these three variables. Recode them if necessary.

Which method did you use to create the composite measure? How did you handle the missing cases?

How many valid cases are there for your new prejudice variable?

How many levels of prejudice are there in your new variable? (What are your codes and corresponding value labels?)

What percentage of respondents report the lowest level of prejudice?

How many respondents score the highest on the prejudice scale?
